# Supplementary material for: Knockout of ovary serine protease Leads to Ovary Deformation and Female Sterility in the Asian Corn Borer, Ostrinia furnacalis
Source: MDPI journal article supplement (doi:10.3390/ijms242216311), 2023-11-14
Supplement: s1 [file s1]

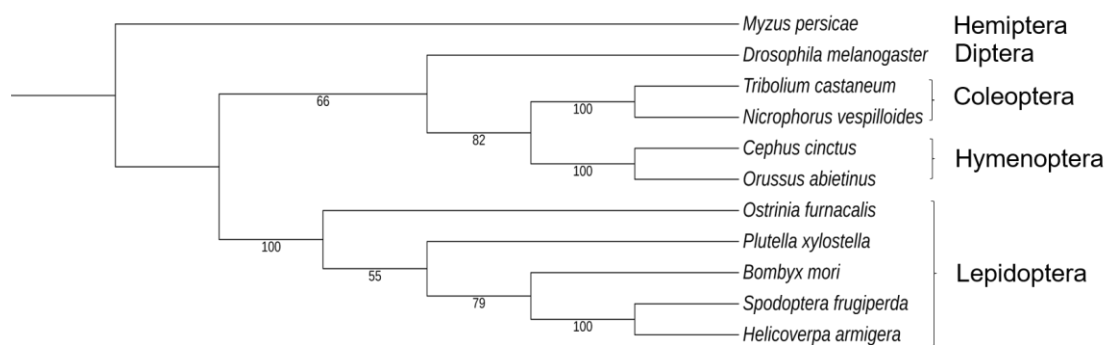

Figure S1. Phylogenetic analysis of Osp amino acid sequence in multi-species. The evolutionary histories of Osp were inferred using the neighbor-joining method. Note: GenBank accession numbers are as follows: *B. mori* (NP\_001037168.1), *H. armigera* (XP\_021187246.1), *P. xylostella* (XP\_011552048.1), *S. frugiperda* (XP\_035438721.2), *D. melanogaster* (NM\_079223.2), *O. abietinus* (XP\_012280703.1), *C. cinctus* (XP\_015603565.1), *N. vespilloides* (XP\_017777496.1), *T. castaneum* (XP\_015840900.1), *M. persicae* (XP\_022174293.1). The OfOsp protein is tightly clustered in the lepidopteran clade (Figure S1), indicating its conserved domain and high sequence identity to OfOsp protein from lepidopteran species.
